# Supplementary material for: Week 240 Efficacy and Safety of Fostemsavir Plus Optimized Background Therapy in Heavily Treatment-Experienced Adults with HIV-1
Source: Springer Nature journal article supplement (doi:10.1007/s40121-023-00870-6), 2023-09-01

## SUPPLEMENTARY MATERIAL

### **Week 240 Efficacy and Safety of Fostemsavir Plus Optimized Background Therapy in Heavily Treatment-Experienced Adults With HIV-1**

Judith A. Aberg,<sup>1</sup> Bronagh Shepherd,<sup>2</sup> Marcia Wang,<sup>3</sup> Jose V. Madruga,<sup>4</sup> Fernando Mendo Urbina,<sup>5</sup> Christine Katlama,<sup>6</sup> Shannon Schrader,<sup>7</sup> Joseph J. Eron,<sup>8</sup> Princy N. Kumar,<sup>9</sup> Eduardo Sprinz,<sup>10</sup> Margaret Gartland,<sup>11</sup> Shiven Chabria,<sup>12</sup> Andrew Clark,<sup>13</sup> Amy Pierce,<sup>11</sup> Max Lataillade,<sup>12</sup> Allan R. Tenorio<sup>11</sup>

<sup>1</sup>Icahn School of Medicine at Mount Sinai, New York, NY, USA; <sup>2</sup>GSK, Brentford, UK; <sup>3</sup>GSK, Collegeville, PA, USA; <sup>4</sup>CRT-DST/AIDS SP, São Paulo, Brazil; <sup>5</sup>Hospital Nacional Edgardo Rebagliati Martins, Lima, Peru; <sup>6</sup>AP-HP, Hôpital Pitié-Salpêtrière, Service de Maladies Infectieuses et Tropicales, INSERM-Sorbonne Universités, Paris, France; <sup>7</sup>Schrader Clinic, Houston, TX, USA; <sup>8</sup>University of North Carolina at Chapel Hill School of Medicine, Chapel Hill, NC, USA; <sup>9</sup>Georgetown University Medical Center, Washington, DC, USA; <sup>10</sup>Hospital de Clínicas de Porto Alegre, Universidade Federal do Rio Grande do Sul, Porto Alegre, Brazil; <sup>11</sup>ViiV Healthcare, Durham, NC, USA; <sup>12</sup>ViiV Healthcare, Branford, CT, USA; <sup>13</sup>ViiV Healthcare, Brentford, UK

**Corresponding author:** Judith A. Aberg, MD, FIDSA, FACP; [judith.aberg@mssm.edu](mailto:judith.aberg@mssm.edu)

## Table of Contents

|                             |    |
|-----------------------------|----|
| Supplementary Methods ..... | 3  |
| Ethics Committees .....     | 4  |
| Table S1. ....              | 7  |
| Table S2. ....              | 8  |
| Table S3. ....              | 9  |
| Table S4. ....              | 10 |
| Table S5. ....              | 12 |
| Table S6. ....              | 13 |
| Figure S1. ....             | 15 |
| Figure S2. ....             | 17 |
| Figure S3. ....             | 18 |

## Supplementary Methods

Central laboratory facilities (Laboratory Corporation of America [Indianapolis, IN; Geneva Switzerland; The Synergy, Singapore]) conducted hematology, HIV-1 RNA testing, and other serology. Genotypic and phenotypic analyses were conducted at screening and after protocol-defined virologic failure, and performed by Monogram Biosciences (South San Francisco, CA) using the PhenoSense GT<sup>®</sup> Plus Integrase, PhenoSense<sup>®</sup> Entry, and Trofile<sup>®</sup> Co-receptor Tropism assays. Genotypic susceptibility was evaluated using pre-specified gp160 amino acid substitutions (S375H/I/M/N/T, M426L, M434I/K, M475I) and most relevant substitutions (S375H/I/M/N/Y, M426L, M434K). Phenotypic temsavir susceptibility was evaluated as the fold change in IC<sub>50</sub> for a test sample vs a laboratory control of HIV-1, with a >3-fold change in IC<sub>50</sub> considered meaningful.

Week 240 statistical analyses were performed by Parexel (Research Triangle Park, NC) and GSK using SAS<sup>®</sup> (SAS Institute, Cary, NC) and TIBCO Spotfire<sup>®</sup> Clinical Graphics (Palo Alto, CA).

## Ethics Committees

Advarra Institutional Review Board  
AHEPA General Hospital of Thessaloniki Institutional Review Board  
Aids Research Consortium of Atlanta Institutional Review Board  
Attikon University Hospital Institutional Review Board  
Bellberry Human Research Ethics Committee  
Biomedical D Research Ethics Committee, McGill University Health Centre, Montreal General Hospital  
Biomedical Research Alliance of New York IRB  
Biomedical Research Alliance of New York LLC Institutional Review Board  
CEIC Hospital Universitario Germans Trias i Pujol  
Children's and Women's Health Centre of British Columbia Research Ethics Board  
CIEIS del Nino y del Adulto  
Comissão de Ética para a Investigação Clínica - CEIC  
Comissao Nacional de Etica em Pesquisa - CONEP  
Comitato Etico IRCCS Istituto Nazionale Malattie Infettive L. Spallanzani  
Comitato Etico Area Monza Brianza  
Comitato Etico dell'IRCCS Ospedale S. Raffaele di Milano  
Comitato Etico Milano Area 1 - ASST Sacco Fatebenefratelli\_4  
Comitato Etico Universita' Cattolica S. Cuore Policlinico Gemelli  
Comité Ético Científico del Servicio de Salud Metropolitano Sur  
Comite d'ethique de la recherche du CHU de Quebec  
Comité de Bioética de la Fundación Huesped  
Comité de Bioética en Investigación Clínica Fundación IDEA  
Comite de Etica CAICI-CIAP  
Comité de Etica del Hospital Nacional Edgardo Rebagliati Martins  
Comité de Etica e Investigación Biomedica de la Fundación Valle de Lili  
Comite de Ética e Investigações de Asistencia Científica de Alta Complejidad SAS  
Comitê de Ética em Pesquisa do Centro de Referência e Treinamento DST/AIDS  
Comite de Etica em Pesquisa do Hospital das Clinicas da Faculdade de Medicina de Ribeirao Preto  
Comitê de Ética em Pesquisa do Hospital de Clínicas de Porto Alegre  
Comitê de Ética em Pesquisa do Instituto de Pesquisa Clínica Evandro Chagas - IPEC  
Comitê de Ética em Pesquisa do Investiga - Instituto de Pesquisas  
Comitê de Ética em Pesquisa em Seres Humanos da Universidade Federal de Minas Gerais  
Comitê de Ética em Pesquisa em Seres Humanos do Hospital das Clínicas da UFPR  
Comitê de Ética em Pesquisa em Seres Humanos Instituto de Infectologia Emílio Ribas – IIER/SP  
Comitê de Ética em Pesquisa Maternidade Climério de Oliveira Universidade Federal da Bahia  
Comite de Etica en Investigacion Biomedica del CDI  
Comité de Ética en Investigación Clínica  
Comite de Etica en Investigacion de Clinica Bajio CLINBA SC  
Comite de Etica en Investigacion de Mexico Centre for Clinical Research SA de CV  
Comité de Ética en Investigación del CEDOPEC  
Comite de Etica en Investigacion del Instituto Nacional de Ciencias Medicas y Nutricion  
Comite de etica en investigacion en el area de la salud de la Universidad del Norte  
Comité de Ética en Investigación Escuela de Medicina Pontificia Universidad Católica de Chile

Comite de Etica en Investigaci3n Hospital Civil de Guadalajara "Fray Antonio Alcalde"  
Comit3 de Evaluaci3n 3tico Cient3fico del Servicio de Salud Metropolitano Sur Oriente  
Comite de Invesitigacion del Instituto Nacional de Ciencias Medicas y Nutricion "Salvador Zubiran"  
Comite de Investigacion de Clinica Bajio CLINBA, S.C.  
Comite de Investigacion de Mexico Centre for Clinical Research S.A. de C.V.  
Comit3 de Investigaci3n del CEDOPEC  
Comit3 d'Ethique du Centre Hospitalier Universitaire Saint Pierre  
Comit3 3tica em Pesquisa Universidade Federal de S3o Paulo-UNIFESP/EPM  
Comit3 3tico Cient3fico del Servicio de Salud Araucan3a Sur  
Comit3 3tico-Cient3fico del Servicio de Salud Metropolitano Oriente (CEC SSMO)  
Comit3 Independiente de Etica para Ensayos en Farmacolog3a Cl3nica del Centro M3dico Dra. De Salvo  
Comit3 Independiente de 3tica para Ensayos en Farmacolog3a Cl3nica por el Prof. Dr.Luis Maria Zieher  
Comit3 Institucional de Bio3tica (CIB) de V3a Libre  
Comite Institucional de Etica en la Investigacion del Hospital Nacional Cayetano Heredia  
Comit3 Institucional de Investigaci3n de Etica de Salud. CIEIS Oulton Romagosa  
Comite Institucional de Revision de Ensayos Clinicos (CIREC)  
Comite voor Medische Ethiek  
Cook County Health and Hospital System Institutional Review Board  
Copernicus Group Independent Review Board  
CPP Ile de France VIII- H3pital Ambroise Par3  
Ethics Committee at Central Research Institute for Epidemiology  
Ethics Committee at Ural State Medical University  
Ethik-Kommission des Fachbereichs Medizin der Johann Wolfgang Goethe-Universit3t Frankfurt  
Georgetown University IRB  
Icahn School of Medicine at Mount Sinai Program for the Protection of Human Subjects  
Institutional Review Board of the Veterans General Hospital Kaohsiung  
Johns Hopkins University IRB  
Kaiser Permanente Southern California Institutional Review Board.  
Komisja Bioetyczna przy Dolnoslaskiej Izbie Lerkarskiej  
London - West London & GTAC  
Mater Misericordiae University Hospital  
National Bioethics Committee for Medicine and Medical Devices  
National Ethics Committee  
Ottawa Health Science Network Research Ethics Board  
Providence Health Care Research Ethics Board  
Quebec Institutional Review Board of IRB Services  
Raad van Bestuur Universitair Medisch Centrum Utrecht  
Research Ethics Committee of National Taiwan University Hospital  
Saint Michael's Medical Center IRB  
The Alfred Hospital Ethics Committee  
The Centre for Applied Ethics - McGill University Health Centre  
The RF MoH, Department of State Regulation of Circulation of Medicines, Ethics Council  
UC Davis Medical Center IRB Administration, Office of Research  
UCSD Human Research Protections Program  
University of Cape Town, Faculty of Health Sciences Human Research Ethics Committee  
University of Cincinnati Medical Center IRB

University of Maryland Human Research Protections Office  
University of Southern California Institutional Review Board  
University of Stellenbosch Institutional Review Board  
University of Texas Southwestern Medical Center Institutional Review Board  
University of Witwatersrand Johannesburg - Human Research Ethics Committee: (Medical)  
Veritas IRB  
Weill Cornell Medical College Institutional Review Board  
Western Institutional Review Board  
Wits Health Consortium Ethics Committee  
Yale University Human Research Protection Program

**Table S1.** Demographic and Baseline Disease Characteristics

| <b>Characteristic</b>                                    | <b>Randomized Cohort (N=272)<sup>a</sup></b> | <b>Non-randomized Cohort (N=99)<sup>a</sup></b> | <b>Total (N=371)</b> |
|----------------------------------------------------------|----------------------------------------------|-------------------------------------------------|----------------------|
| Age, y, n (%)                                            |                                              |                                                 |                      |
| <35                                                      | 61 (22)                                      | 14 (14)                                         | 75 (20)              |
| 35 to 49                                                 | 100 (37)                                     | 30 (30)                                         | 130 (35)             |
| ≥50                                                      | 111 (41)                                     | 55 (56)                                         | 166 (45)             |
| Sex, n (%)                                               |                                              |                                                 |                      |
| Male                                                     | 201 (74)                                     | 89 (90)                                         | 290 (78)             |
| Female                                                   | 71 (26)                                      | 10 (10)                                         | 81 (22)              |
| Race (%)                                                 |                                              |                                                 |                      |
| White                                                    | 185 (68)                                     | 74 (75)                                         | 259 (70)             |
| Black or African American                                | 60 (22)                                      | 23 (23)                                         | 83 (22)              |
| American Indian or Alaska Native                         | 7 (3)                                        | 1 (1)                                           | 8 (2)                |
| Asian                                                    | 2 (<1)                                       | 0                                               | 2 (<1)               |
| Native Hawaiian or Other Pacific Islander                | 1 (<1)                                       | 0                                               | 1 (<1)               |
| Other races                                              | 17 (6)                                       | 1 (1)                                           | 18 (5)               |
| HIV-1 RNA, median (IQR), log <sub>10</sub> copies/mL     | 4.66 (3.87-5.09)                             | 4.31 (3.64-4.77)                                | 4.55 (3.85-5.02)     |
| Baseline HIV-1 RNA, n (%), copies/mL                     |                                              |                                                 |                      |
| <1000                                                    | 31 (11)                                      | 9 (9)                                           | 40 (11)              |
| 1000 to <10,000                                          | 44 (16)                                      | 24 (24)                                         | 68 (18)              |
| 10,000 to <100,000                                       | 117 (43)                                     | 51 (52)                                         | 168 (45)             |
| ≥100,000                                                 | 80 (29)                                      | 15 (15)                                         | 95 (26)              |
| CD4+ T-cell count, median (IQR), cells/mm <sup>3</sup>   | 99.5 (15-207)                                | 41.0 (6-161)                                    | 80.0 (11-202)        |
| Baseline CD4+ T-cell count, n (%), cells/mm <sup>3</sup> |                                              |                                                 |                      |
| <20                                                      | 72 (26)                                      | 40 (40)                                         | 112 (30)             |
| 20 to <50                                                | 25 (9)                                       | 14 (14)                                         | 39 (11)              |
| 50 to <100                                               | 39 (14)                                      | 14 (14)                                         | 53 (14)              |
| 100 to <200                                              | 63 (23)                                      | 11 (11)                                         | 74 (20)              |
| ≥200                                                     | 73 (27)                                      | 20 (20)                                         | 93 (25)              |
| FAA ARVs in initial OBT, n (%)                           |                                              |                                                 |                      |
| 0                                                        | 15 (6)                                       | 79 (80)                                         | 94 (25)              |
| 1                                                        | 142 (52)                                     | 20 (20) <sup>b</sup>                            | 162 (44)             |
| 2                                                        | 115 (42)                                     | 0                                               | 115 (31)             |

ARV, antiretroviral; FAA, fully active and available; OBT, optimized background therapy.

<sup>a</sup>N=267 and N=92 at Week 240 after 12 participants completed the study. <sup>b</sup>4 participants had 1 fully active and available ARV at screening, and 16 received ibalizumab, which was still investigational at study start.

**Table S2.** Proportion of Participants With Virologic Response (HIV-1 RNA <40 Copies/mL) by Baseline HIV-1 RNA and CD4+ T-Cell Count, Snapshot: ITT-E Population<sup>a</sup>

| Subgroup, n/N (%)                                 | Randomized Cohort (N=272) |             |                       | Non-randomized Cohort (N=99) |            |                       |
|---------------------------------------------------|---------------------------|-------------|-----------------------|------------------------------|------------|-----------------------|
|                                                   | Week 144                  | Week 192    | Week 240 <sup>b</sup> | Week 144                     | Week 192   | Week 240 <sup>c</sup> |
| Baseline HIV-1 RNA, copies/mL                     |                           |             |                       |                              |            |                       |
| <1000                                             | 18/31 (58)                | 20/31 (65)  | 19/30 (63)            | 5/9 (56)                     | 6/9 (67)   | 4/7 (57)              |
| 1000 to <10,000                                   | 28/44 (64)                | 28/44 (64)  | 23/42 (55)            | 11/24 (46)                   | 8/24 (33)  | 4/23 (17)             |
| 10,000 to <100,000                                | 71/117 (61)               | 70/117 (60) | 56/116 (48)           | 16/51 (31)                   | 15/51 (29) | 11/48 (23)            |
| ≥100,000                                          | 31/80 (39)                | 27/80 (34)  | 22/79 (28)            | 3/15 (20)                    | 3/15 (20)  | 1/14 (7)              |
| Baseline CD4+ T-cell count, cells/mm <sup>3</sup> |                           |             |                       |                              |            |                       |
| <20                                               | 29/72 (40)                | 32/72 (44)  | 23/70 (33)            | 10/40 (25)                   | 10/40 (25) | 6/37 (16)             |
| 20 to <50                                         | 12/25 (48)                | 10/25 (40)  | 8/25 (32)             | 3/14 (21)                    | 2/14 (14)  | 1/13 (8)              |
| 50 to <100                                        | 21/39 (54)                | 17/39 (44)  | 15/38 (39)            | 8/14 (57)                    | 6/14 (43)  | 2/13 (15)             |
| 100 to <200                                       | 34/63 (54)                | 38/63 (60)  | 28/62 (45)            | 5/11 (45)                    | 5/11 (45)  | 2/10 (20)             |
| ≥200                                              | 52/73 (71)                | 48/73 (66)  | 46/72 (64)            | 9/20 (45)                    | 9/20 (45)  | 9/19 (47)             |

ITT-E, intention-to-treat exposed.

<sup>a</sup>Missing and change in optimized background therapy counted as failure. <sup>b</sup>N=267. <sup>c</sup>N=92.



**Table S3.** Incidence of PDVF by Baseline Disease Characteristics Through Week 240

| <b>Category, n/N (%)<sup>a</sup></b>                 | <b>Randomized Cohort<br/>(N=272)</b> | <b>Non-randomized Cohort<br/>(N=99)</b> |
|------------------------------------------------------|--------------------------------------|-----------------------------------------|
| Baseline HIV-1 RNA,<br>copies/mL                     |                                      |                                         |
| <400                                                 | 4/21 (19)                            | 2/5 (40)                                |
| 400 to <1000                                         | 2/10 (20)                            | 0/4 (0)                                 |
| 1000 to 10,000                                       | 8/44 (18)                            | 12/24 (50)                              |
| 10,000 to <30,000                                    | 10/42 (24)                           | 13/25 (52)                              |
| 30,000 to <100,000                                   | 20/75 (27)                           | 18/26 (69)                              |
| 100,000 to <500,000                                  | 23/59 (39)                           | 7/13 (54)                               |
| ≥500,000                                             | 13/21 (62)                           | 1/2 (50)                                |
| Baseline CD4+ T-cell count,<br>cells/mm <sup>3</sup> |                                      |                                         |
| <20                                                  | 29/72 (40)                           | 27/40 (68)                              |
| 20 to <50                                            | 8/25 (32)                            | 6/14 (43)                               |
| 50 to <100                                           | 12/39 (31)                           | 6/14 (43)                               |
| 100 to <200                                          | 20/63 (32)                           | 4/11 (36)                               |
| 200 to <350                                          | 8/44 (18)                            | 10/15 (67)                              |
| 350 to <500                                          | 1/14 (7)                             | 0/3 (0)                                 |
| ≥500                                                 | 2/15 (13)                            | 0/2 (0)                                 |
| History of AIDS                                      |                                      |                                         |
| Yes                                                  | 77/231 (33)                          | 50/89 (56)                              |
| No                                                   | 3/41 (7)                             | 3/10 (30)                               |

PDVF, protocol-defined virologic failure.

<sup>a</sup>Percentages are based on participants meeting PDVF out of the total number of participants for the particular row (n/N).

**Table S4.** Quantitative Plasma Viral Loads for Participants Who Included IBA in OBT

| Participant           | Study days with IBA in OBT |      | Plasma HIV-1 RNA, copies/mL |                                         |                 |                                             |                                              |          |                          |
|-----------------------|----------------------------|------|-----------------------------|-----------------------------------------|-----------------|---------------------------------------------|----------------------------------------------|----------|--------------------------|
|                       | First                      | Last | Baseline                    | Week 24                                 | Week 48         | Week 96                                     | Week 144                                     | Week 192 | Week 240                 |
| Non-randomized Cohort |                            |      |                             |                                         |                 |                                             |                                              |          |                          |
| 1                     | 1                          | 1956 | 149,227                     | <40                                     | <40             | <40                                         | TND                                          | <40/TND  | TND                      |
| 2                     | 1                          | 1666 | 220                         | TND                                     | TND             | TND                                         | TND                                          | TND      | TND                      |
| 3                     | 1                          | 1848 | 22,499                      | <40                                     | TND             | TND                                         | TND                                          | TND      | Missing <sup>a</sup>     |
| 4                     | 1                          | 1217 | 1806                        | TND                                     | <40             | TND                                         | TND                                          | TND      | Unavailable <sup>b</sup> |
| 5                     | 1                          | 1597 | 740                         | TND                                     | TND             | TND                                         | TND                                          | TND      | Completed <sup>c</sup>   |
| 6                     | 1                          | 1573 | 11,447                      | 44/<40                                  | TND             | <40                                         | 2290/1910                                    | 95,333   | Completed <sup>c</sup>   |
| 7                     | 1                          | 988  | 6427                        | 1060                                    | 51              | 40                                          | <40                                          | TND      | Completed <sup>c</sup>   |
| 8                     | 8                          | 932  | 1097                        | 13,305                                  | 8401            | 4622/4316                                   | Last observation: Week 132, 8034 copies/mL   |          |                          |
| 9                     | 1                          | 864  | 169                         | 582                                     | 31,679          | 33,182                                      | Last observation: Week 120, 5567 copies/mL   |          |                          |
| 10                    | 1                          | 510  | 53,430                      | TND                                     | 438/TND         | Last observation: Week 72, TND              |                                              |          |                          |
| 11                    | 1                          | 177  | 39,610                      | 134,480                                 | 318,669/343,151 | Last observation: Week 48                   |                                              |          |                          |
| 12                    | 6                          | 510  | 9203                        | <40/<40                                 | <40             | Last observation: Week 72, 672 copies/mL    |                                              |          |                          |
| 13                    | 6                          | 610  | <40                         | 8825                                    | 15,235          | Last observation: Week 84, 3343 copies/mL   |                                              |          |                          |
| 14                    | 1                          | 495  | 112,009                     | TND                                     | TND             | Last observation: Week 48                   |                                              |          |                          |
| 15                    | 1                          | 28   | 1356                        | Last observation: Week 4, 82 copies/mL  |                 |                                             |                                              |          |                          |
| 16                    | 8                          | 142  | 25,660                      | Last observation: Week 16, 83 copies/mL |                 |                                             |                                              |          |                          |
| 17 <sup>d</sup>       | 13                         | 155  | 16,234                      | 33,543                                  | 34,884          | 32,981                                      | 15,864                                       | 8022     | 6937                     |
| 18 <sup>d</sup>       | 292                        | 1814 | 22,074                      | 9424/22,337                             | <40             | <40                                         | TND                                          | TND      | <40                      |
| 19 <sup>d</sup>       | 415                        | 1437 | 24,608                      | 63,595                                  | 199,246         | 117,142                                     | 100,289                                      | 160,174  | Unavailable <sup>e</sup> |
| 20 <sup>d</sup>       | 841                        | 925  | 40,815                      | 37,176                                  | 19,738          | 50,706                                      | Last observation: Week 120, 21,402 copies/mL |          |                          |
| 21 <sup>d</sup>       | 413                        | 484  | 42,894                      | 85,379                                  | 85,810          | Last observation: Week 72, 58,467 copies/mL |                                              |          |                          |
| 22 <sup>d</sup>       | 208                        | 585  | 21,252                      | 28,703                                  | 13,760          | Last observation: Week 48                   |                                              |          |                          |
| Randomized Cohort     |                            |      |                             |                                         |                 |                                             |                                              |          |                          |
| 23 <sup>d</sup>       | 1217                       | 1791 | 61,093                      | 236                                     | 54              | <40/<40                                     | 933                                          | <40      | 3300/6778                |
| 24 <sup>d</sup>       | 1133                       | 1990 | 52,610                      | <40                                     | <40             | TND                                         | TND                                          | TND      | TND                      |
| 25 <sup>d</sup>       | 1073                       | 1912 | 38,019                      | 755                                     | 1540/889/325    | <40                                         | TND                                          | TND      | TND                      |

|                 |      |      |         |     |     |        |             |               |     |
|-----------------|------|------|---------|-----|-----|--------|-------------|---------------|-----|
| 26 <sup>d</sup> | 1101 | 1907 | 245,036 | 112 | <40 | <40    | 15,415      | <40           | <40 |
| 27 <sup>d</sup> | 991  | 1998 | 911,694 | 630 | 133 | 52/516 | 142,841/443 | 80,776/16,168 | 546 |
| 28 <sup>d</sup> | 1517 | 1769 | 91,433  | 314 | 121 | 43     | TND         | TND           | TND |

IBA, ibalizumab; OBT, optimized background therapy; TND, target not detected.

<sup>a</sup>Week 240 data missing but later observations recorded. <sup>b</sup>Last observation Week 204, TND. <sup>c</sup>Completed the study at Week 228. <sup>d</sup>Did not include IBA in initial OBT. <sup>e</sup>Last observation at follow-up visit, 119,202 c/mL.

**Table S5.** Summary of Emergent Viral Genotypic Substitutions of Interest in gp160: Protocol-Defined Virologic Failure Population Through Week 240<sup>a</sup>

| n (%)                                      | Randomized       | Non-randomized   | Total<br>(N=133) |
|--------------------------------------------|------------------|------------------|------------------|
|                                            | Cohort<br>(N=80) | Cohort<br>(N=53) |                  |
| Sequenced                                  | 71 (89)          | 51 (96)          | 122 (92)         |
| Pre-specified substitutions <sup>b,c</sup> | 30 (42)          | 33 (65)          | 63 (52)          |
| Most relevant substitutions <sup>b,d</sup> | 24 (34)          | 32 (63)          | 56 (46)          |
| S375                                       | 17 (24)          | 21 (41)          | 38 (31)          |
| S375H                                      | 0                | 1 (2)            | 1 (<1)           |
| S375H/N                                    | 1 (1)            | 1 (2)            | 2 (2)            |
| S375M                                      | 0                | 3 (6)            | 3 (2)            |
| S375N                                      | 8 (11)           | 8 (16)           | 16 (13)          |
| S375N/T                                    | 1 (1)            | 2 (4)            | 3 (2)            |
| S375S/H                                    | 1 (1)            | 0                | 1 (<1)           |
| S375S/I                                    | 0                | 1 (2)            | 1 (<1)           |
| S375S/M/T                                  | 1 (1)            | 0                | 1 (<1)           |
| S375S/N                                    | 4 (6)            | 5 (10)           | 9 (7)            |
| S375S/T                                    | 1 (1)            | 0                | 1 (<1)           |
| M426                                       | 16 (23)          | 20 (39)          | 36 (30)          |
| M426L                                      | 10 (14)          | 13 (25)          | 23 (19)          |
| M426M/L                                    | 6 (8)            | 7 (14)           | 13 (11)          |
| M434                                       | 6 (8)            | 4 (8)            | 10 (8)           |
| M434I                                      | 1 (1)            | 1 (2)            | 2 (2)            |
| M434K                                      | 1 (1)            | 0                | 1 (<1)           |
| M434M/I                                    | 3 (4)            | 3 (6)            | 6 (5)            |
| M434M/I/T                                  | 1 (1)            | 0                | 1 (<1)           |
| M475                                       | 8 (11)           | 6 (12)           | 14 (11)          |
| M475I                                      | 4 (6)            | 2 (4)            | 6 (5)            |
| M475M/I                                    | 4 (6)            | 4 (8)            | 8 (7)            |

<sup>a</sup>Sequencing results at additional on-treatment time points around the time of protocol-defined virologic failure are included where available (not limited to only the protocol-defined virologic failure time point).

<sup>b</sup>Denominator for proportions with substitutions is the number sequenced for each cohort and overall.

<sup>c</sup>S375H/I/M/N/T, M426L, M434I/K, M475I. <sup>d</sup>S375H/I/M/N/Y, M426L, M434K.

**Table S6.** Baseline and Last Available CD4+ T-Cell Count for Participants Who Died

| <b>Participant</b> | <b>Baseline CD4+ T-cell count, cells/mm<sup>3</sup></b> | <b>Last available CD4+ T-cell count, cells/mm<sup>3</sup></b> | <b>Day of last available CD4+ T-cell count</b> | <b>Day of study withdrawal</b> | <b>Day of death</b> | <b>Primary cause of death</b>                                   |
|--------------------|---------------------------------------------------------|---------------------------------------------------------------|------------------------------------------------|--------------------------------|---------------------|-----------------------------------------------------------------|
| 1                  | 98                                                      | 160                                                           | 1387                                           | 1632                           | Unknown             | Rectal cancer                                                   |
| 2                  | 92                                                      | 171                                                           | 1776                                           | 1821                           | 1821                | Pneumonia                                                       |
| 3                  | 80                                                      | 2                                                             | 1764                                           | 1772                           | 1772                | Progression of AIDS disease                                     |
| 4                  | 5                                                       | 0                                                             | 1189                                           | 1266                           | 1266                | Pulmonary septic shock                                          |
| 5                  | 1                                                       | 4                                                             | 1008                                           | 1112                           | 1112                | HIV wasting syndrome                                            |
| 6                  | 28                                                      | 148                                                           | 1021                                           | 1094                           | 1094                | Hodgkin's disease                                               |
| 7                  | 4                                                       | 1                                                             | 1010                                           | 1089                           | 1089                | Respiratory insufficiency possibly due to AIDS-defining illness |
| 8                  | 22                                                      | 189                                                           | 840                                            | 879                            | 879                 | Cerebrovascular accident (left middle cerebral artery stroke)   |
| 9                  | 349                                                     | 494                                                           | 847                                            | 875                            | 875                 | Cholangiocarcinoma                                              |
| 10                 | 249                                                     | 257                                                           | 508                                            | 736                            | 765                 | Anal squamous cell carcinoma                                    |
| 11                 | 1                                                       | 3                                                             | 577                                            | 661                            | 661                 | Disseminated cytomegaloviral infection                          |
| 12                 | 0                                                       | 5                                                             | 588                                            | 660                            | 660                 | Hodgkin's disease                                               |
| 13                 | 160                                                     | 172                                                           | 511                                            | 603                            | 603                 | Pseudomonal sepsis                                              |
| 14                 | 35                                                      | 18                                                            | 504                                            | 580                            | 580                 | Sepsis                                                          |
| 15                 | 1                                                       | 2                                                             | 515                                            | 537                            | 537                 | Hepatic failure (due to hepatitis B)                            |
| 16                 | 27                                                      | 30                                                            | 486                                            | 486                            | 535                 | Squamous cell carcinoma                                         |
| 17                 | 6                                                       | 34                                                            | 498                                            | 530                            | 530                 | Cardiovascular disorder                                         |
| 18                 | 173                                                     | 7                                                             | 510                                            | 510                            | 515                 | Tonsil cancer                                                   |
| 19                 | 1                                                       | 3                                                             | 425                                            | 511                            | 511                 | Clostridium difficile colitis                                   |

|    |     |     |     |     |     |                                                          |
|----|-----|-----|-----|-----|-----|----------------------------------------------------------|
| 20 | 7   | 37  | 347 | 504 | 504 | Sepsis                                                   |
| 21 | 166 | 176 | 424 | 466 | 466 | Staphylococcal sepsis                                    |
| 22 | 42  | 234 | 335 | 392 | 392 | Pulmonary/Cutaneous sepsis                               |
| 23 | 3   | 1   | 259 | 277 | 354 | Cytomegalovirus colitis                                  |
| 24 | 1   | 4   | 253 | 350 | 350 | Acute kidney injury (advanced AIDS)                      |
| 25 | 12  | 37  | 264 | 334 | 334 | Septic shock                                             |
| 26 | 55  | 55  | 262 | 287 | 287 | Progressive multifocal leukoencephalopathy               |
| 27 | 1   | 1   | 179 | 179 | 228 | Pneumonia                                                |
| 28 | 1   | 1   | 121 | 199 | 199 | Pneumonia                                                |
| 29 | 2   | 10  | 127 | 160 | 160 | Kaposi's sarcoma                                         |
| 30 | 4   | 6   | 142 | 158 | 158 | Encephalitis cytomegalovirus                             |
| 31 | 1   | 2   | 119 | 142 | 142 | Hepatic failure                                          |
| 32 | 11  | 8   | 83  | 101 | 101 | Meningoencephalitis viral                                |
| 33 | 42  | 24  | 15  | 33  | 33  | Lymphoma                                                 |
| 34 | 1   | 5   | 8   | 32  | 32  | Immune reconstitution inflammatory syndrome              |
| 35 | 14  | 14  | 1   | 11  | 11  | Acute respiratory failure (community-acquired pneumonia) |

**Figure S1.** Participant disposition through the Week 240 database lock. ARV, antiretroviral.

<sup>a</sup>The 2 most common reasons for not meeting study criteria were >2 ARV classes remaining at screening and/or not failing current ARV regimen with a confirmed plasma HIV-1 RNA  $\geq$ 400 copies/mL. <sup>b</sup>80 participants completed the study by the time of the Week 240 database lock, though only 12 did so before their Week 240 observations. <sup>c</sup>Primary reasons listed. Each participant may have only 1 primary reason. <sup>d</sup>A total of 35 participants died. Death was recorded as the reason for withdrawal in 28/35 cases. <sup>e</sup>Other reasons for discontinuation were investigator decision, HIV resistance, investigator discretion due to the rapid progression of participant's malignancy, and participant developed transportation obstacles preventing ongoing participation.

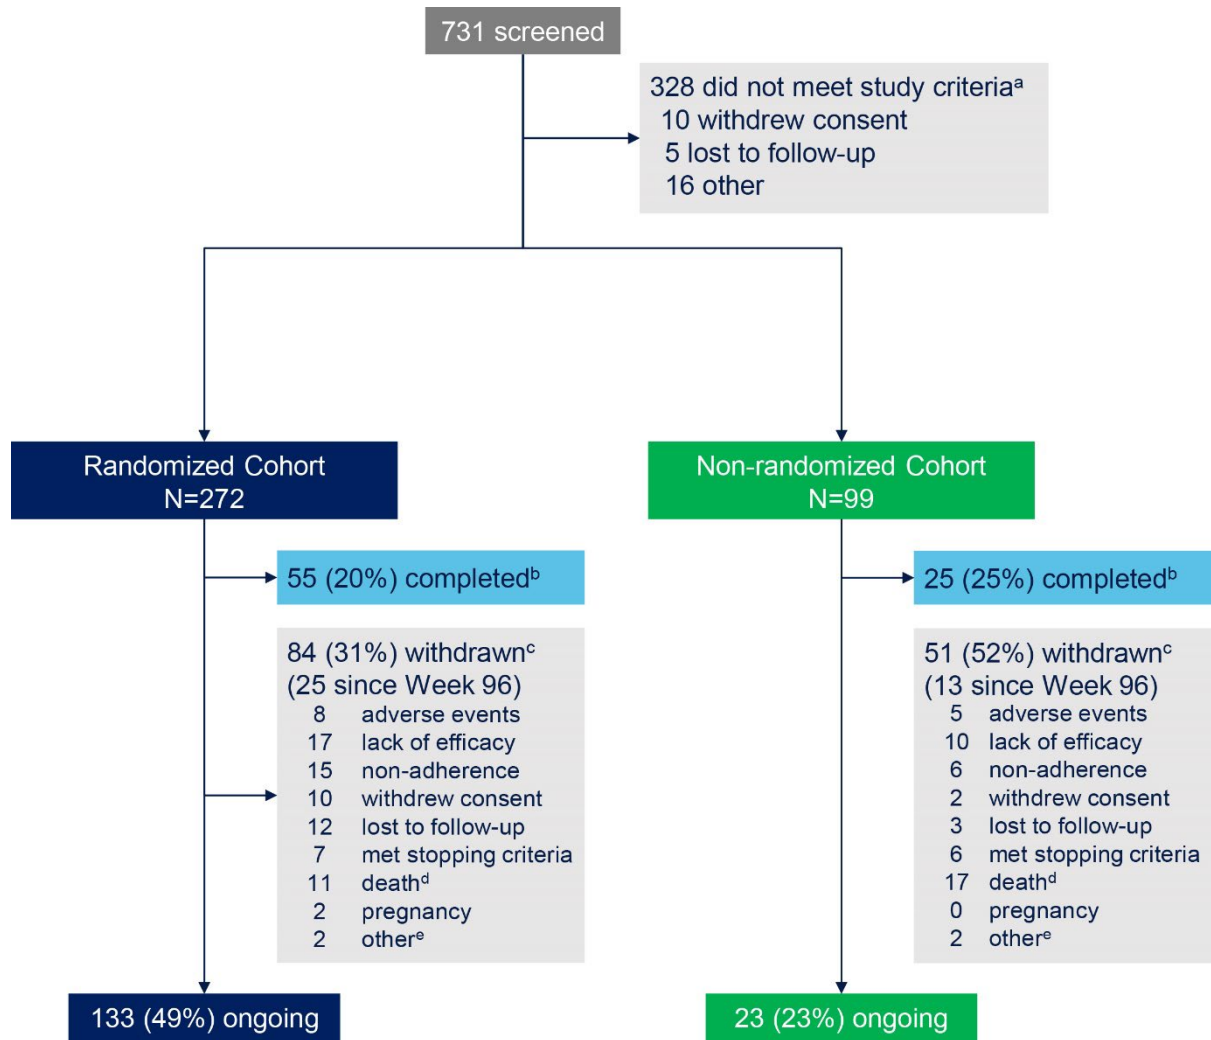



**Figure S2.** Proportion of participants with virologic response (HIV-1 RNA <40 copies/mL) at Weeks 192 and 240 by initial OBТ, intention-to-treat–exposed population (Snapshot analysis). The 12 participants who completed before the Week 240 analysis were excluded. IBA, ibalizumab; INSTI, integrase strand transfer inhibitor; MVC, maraviroc; NNRTI, non-nucleoside reverse transcriptase inhibitor; NRTI, nucleoside reverse transcriptase inhibitor; OBТ, optimized background therapy; PI, protease inhibitor; T20, enfuvirtide. <sup>a</sup>IBA was an investigational agent at the beginning of BRIGHTE and was not available to the Randomized Cohort as part of their initial OBТ. After regulatory approval of IBA, 6 participants in the Randomized Cohort added IBA to their OBТ.

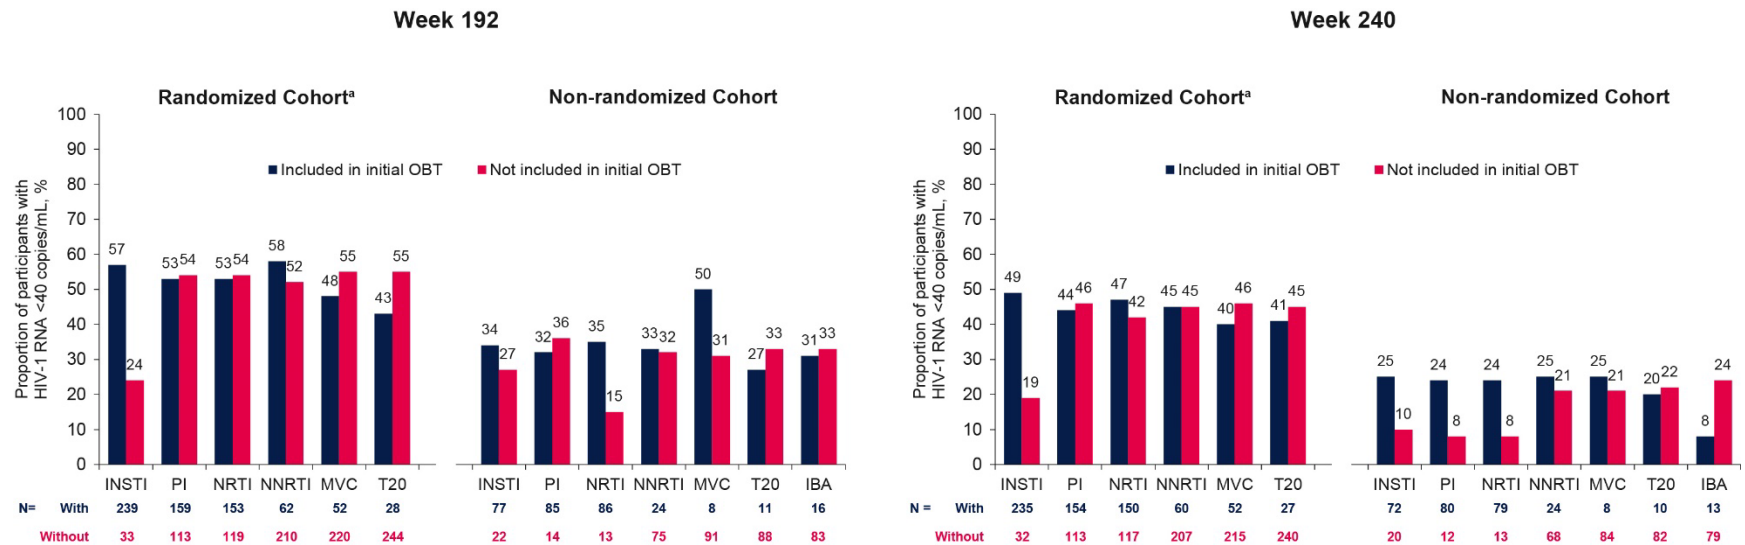

**Figure S3.** Change in CD4+ T-cell count from baseline to Week 240 by **(a)** baseline CD4+ T-cell count, **(b)** baseline viral load, and **(c)** virologic response at the same time point (Randomized Cohort, observed analysis). Mean baseline CD4+ T-cell count by baseline viral load subgroup was <1000 copies/mL: 388.7 cells/mm<sup>3</sup>; 1000 to <10,000 copies/mL: 200.4 cells/mm<sup>3</sup>; 10,000 to <100,000 copies/mL: 135.3 cells/mm<sup>3</sup>; ≥100,000 copies/mL: 59.9 cells/mm<sup>3</sup>.

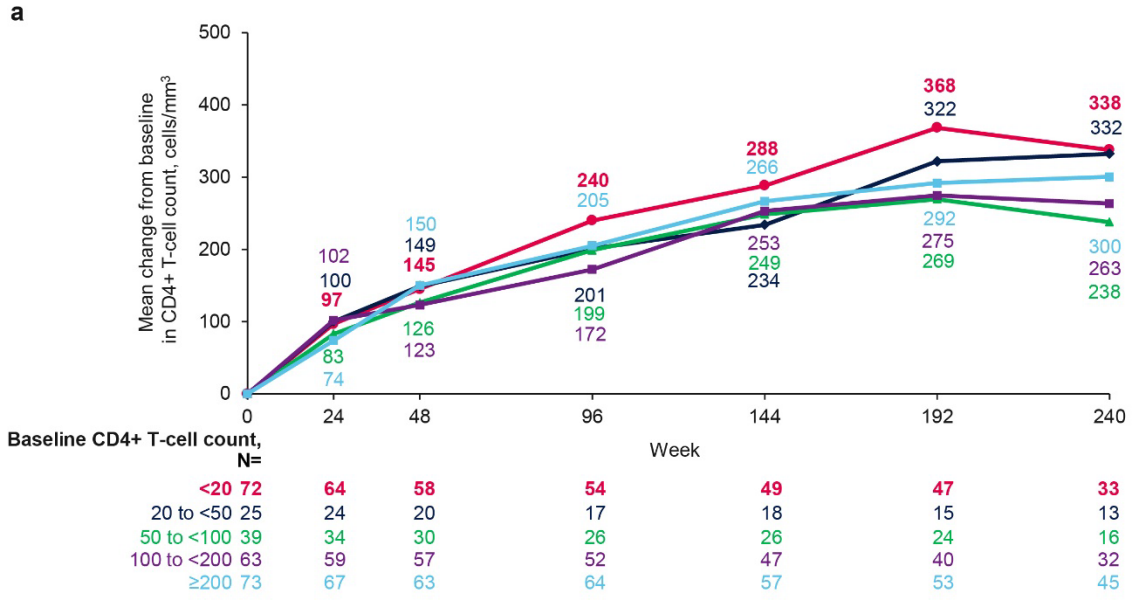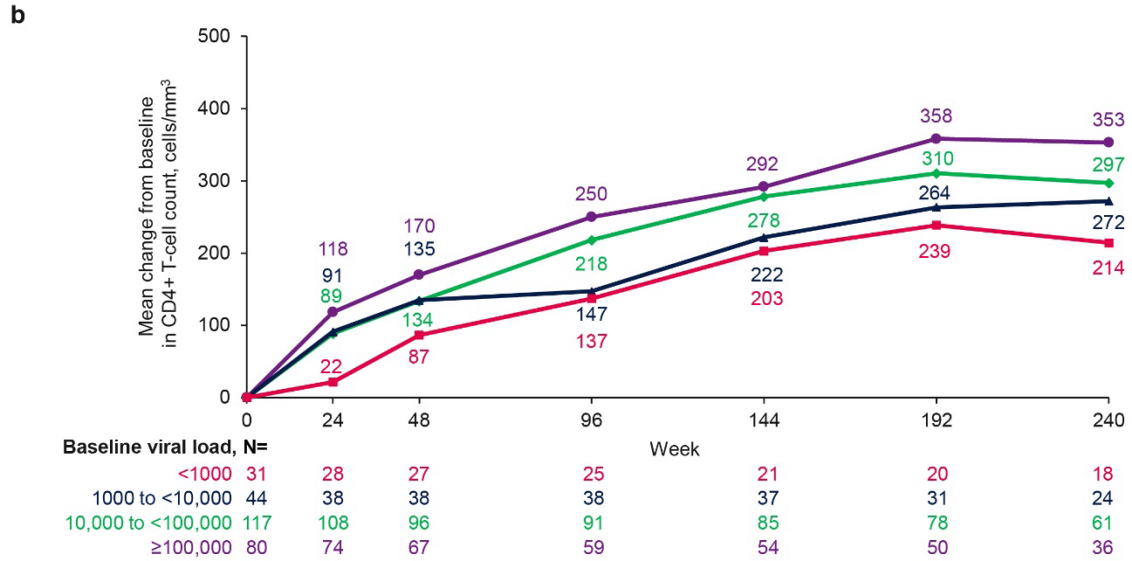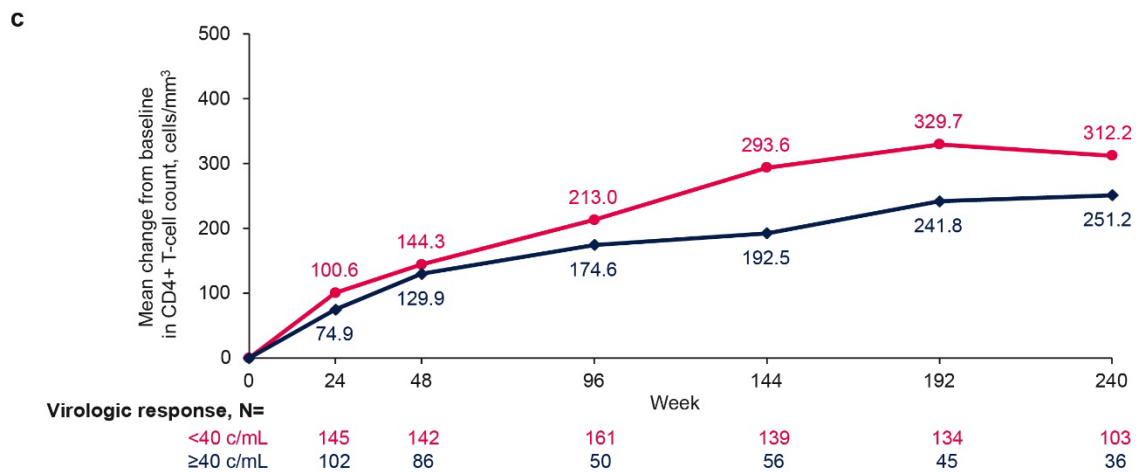

Supplement: MOESM1 [file 26090170]
